# Supplementary material
Source: HighWire-hosted journal article supplement (https://cmajopen-stage.highwire.org/highwire/filestream/87776/field_highwire_adjunct_files/2/2020-0289-3-at.pdf)
Supplement: 2020-0289-3-at.pdf [file 2020-0289-3-at.pdf]

### Appendix 3

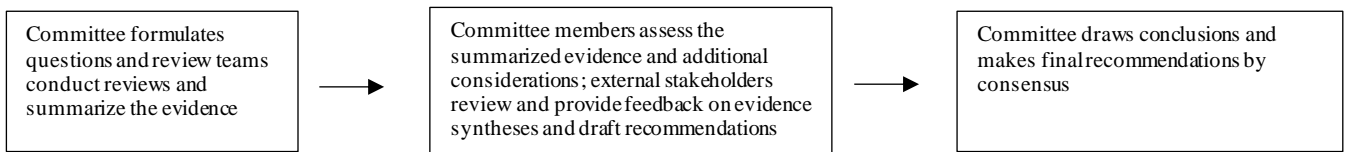

| Criteria                                    | Research Evidence | Additional Considerations | Committee's Judgement                                                                                                                                                                                                                                                                                                                                                                                                      |
|---------------------------------------------|-------------------|---------------------------|----------------------------------------------------------------------------------------------------------------------------------------------------------------------------------------------------------------------------------------------------------------------------------------------------------------------------------------------------------------------------------------------------------------------------|
| Desirable effects (benefits)                |                   |                           | <b>How substantial are the <i>desirable</i> anticipated effects?</b> <ul style="list-style-type: none"> <li>○ Trivial</li> <li>○ Small</li> <li>○ Moderate</li> <li>○ Large</li> <li>○ Varies</li> <li>○ Don't know</li> </ul>                                                                                                                                                                                             |
| Undesirable effects (harms)                 |                   |                           | <b>How substantial are the <i>undesirable</i> anticipated effects?</b> <ul style="list-style-type: none"> <li>○ Large</li> <li>○ Moderate</li> <li>○ Small</li> <li>○ Trivial</li> <li>○ Varies</li> <li>○ Don't know</li> </ul>                                                                                                                                                                                           |
| Certainty of the evidence                   |                   |                           | <b>What is the overall certainty of the evidence of effects?</b> <ul style="list-style-type: none"> <li>○ Very low</li> <li>○ Low</li> <li>○ Moderate</li> <li>○ High</li> <li>○ No included studies</li> </ul>                                                                                                                                                                                                            |
| Balance of desirable vs undesirable effects |                   |                           | <b>Does the balance between desirable and undesirable effects favor the intervention or the comparison?</b> <ul style="list-style-type: none"> <li>○ Favors the comparison</li> <li>○ Probably favors the comparison</li> <li>○ Does not favor either the intervention or the comparison</li> <li>○ Probably favors the intervention</li> <li>○ Favors the intervention</li> <li>○ Varies</li> <li>○ Don't know</li> </ul> |

|                        |  |  |                                                                                                                                                                                                                                                                                                                                                                                           |
|------------------------|--|--|-------------------------------------------------------------------------------------------------------------------------------------------------------------------------------------------------------------------------------------------------------------------------------------------------------------------------------------------------------------------------------------------|
| Values and preferences |  |  | <p><b>Is there important uncertainty about or variability in how much people value and prefer the main outcomes?</b></p> <ul style="list-style-type: none"> <li>○ Important uncertainty or variability</li> <li>○ Possibly important uncertainty or variability</li> <li>○ Probably no important uncertainty or variability</li> <li>○ No important uncertainty or variability</li> </ul> |
| Cost                   |  |  | <p><b>Are there any additional incurred costs to patients?</b></p> <ul style="list-style-type: none"> <li>○ No</li> <li>○ Probably no</li> <li>○ Probably yes</li> <li>○ Yes</li> <li>○ Varies</li> <li>○ Don't know</li> </ul>                                                                                                                                                           |
| Acceptability          |  |  | <p><b>Is the intervention acceptable to key stakeholders?</b></p> <ul style="list-style-type: none"> <li>○ No</li> <li>○ Probably no</li> <li>○ Probably yes</li> <li>○ Yes</li> <li>○ Varies</li> <li>○ Don't know</li> </ul>                                                                                                                                                            |
| Feasibility            |  |  | <p><b>Is the intervention feasible to implement?</b></p> <ul style="list-style-type: none"> <li>○ No</li> <li>○ Probably no</li> <li>○ Probably yes</li> <li>○ Yes</li> <li>○ Varies</li> <li>○ Don't know</li> </ul>                                                                                                                                                                     |
